# Supplementary material
Source: bioRxiv or medRxiv preprint supplement (https://www.biorxiv.org/highwire/filestream/62242/field_highwire_adjunct_files/2/130948-11.pdf)
Supplement: Supplementary file [file 130948-11.pdf]

| Cell Definitions                | Effect Size  | 95% CI Lower | 95% CI Upper | Sample Size | p value  | Adjusted p value |
|---------------------------------|--------------|--------------|--------------|-------------|----------|------------------|
| CD27+ CD3+ CD4+ CD8-            | -0.451284953 | -0.663610952 | -0.238958954 | 736         | 3.38E-05 | 0.00307281       |
| CD127+ CD3+ CD4+ CD8-           | -0.353141416 | -0.537413611 | -0.168869221 | 613         | 0.000184 | 0.004940294      |
| CD28- CD3+ CD4- CD8+            | 0.412056948  | 0.195091008  | 0.629022889  | 841         | 0.000206 | 0.004940294      |
| CD127- CD3+ CD4- CD45RA+        | 0.477584433  | 0.224548434  | 0.730620433  | 581         | 0.00023  | 0.004940294      |
| CD3+ CD4- CD45RA+ CD8+ CD85J-   | 0.427467022  | 0.19766864   | 0.657265404  | 580         | 0.000283 | 0.004940294      |
| CD3+ CD4+ CD45RA+ CD8+          | -0.248959228 | -0.384811596 | -0.113106861 | 871         | 0.000341 | 0.004940294      |
| CD19- CD3+ CD33- CD4- CD8+      | 0.413196221  | 0.185426148  | 0.640966294  | 651         | 0.000395 | 0.004940294      |
| CD28- CD3+ CD4- CD45RA+ CD8+    | 0.429406171  | 0.18999344   | 0.668818902  | 623         | 0.00046  | 0.004940294      |
| CCR7+ CD3+ CD4- CD45RA+         | 0.340968091  | 0.149976487  | 0.531959694  | 622         | 0.000489 | 0.004940294      |
| CD161- CD3+ CD4+ CD8-           | -0.431621407 | -0.680239169 | -0.183003645 | 581         | 0.000696 | 0.005819442      |
| CD27+ CD3+ CD4+ CD45RA+         | -0.374878225 | -0.591854915 | -0.157901535 | 658         | 0.000735 | 0.005819442      |
| CD28+ CD3+ CD4+ CD8-            | -0.30415783  | -0.480945263 | -0.127370397 | 841         | 0.000767 | 0.005819442      |
| CD27+ CD3+ CD4+ CD45RA+ CD8-    | -0.372166002 | -0.593455178 | -0.150876826 | 658         | 0.001011 | 0.007079536      |
| CD3+ CD4- CD45RA+ CD8+          | 0.285808068  | 0.106677096  | 0.464939039  | 871         | 0.001798 | 0.011687174      |
| CD19- CD3+ CD33- CD4+           | -0.362652656 | -0.592139147 | -0.133166166 | 651         | 0.001999 | 0.012129321      |
| CD3+ CD4+ CD45RA+ CD8-          | -0.255970879 | -0.421264267 | -0.090677491 | 871         | 0.002443 | 0.013891723      |
| CD27- CD3+ CD4- CD8+            | 0.338285572  | 0.107878324  | 0.56869282   | 736         | 0.004063 | 0.021749762      |
| CD19- CD20- CD27+ CD3+ IGD-     | -0.326420368 | -0.557721402 | -0.095119334 | 581         | 0.005756 | 0.024740629      |
| CD27+ CD28+ CD3+ CD4+ CD85J+    | -0.354405306 | -0.605544531 | -0.103266081 | 580         | 0.005758 | 0.024740629      |
| CCR7+ CD28+ CD3+ CD4+           | -0.267581346 | -0.457527979 | -0.077634713 | 694         | 0.005831 | 0.024740629      |
| CD161- CD3+ CD4+ CD45RA+ CD8-   | -0.348043867 | -0.595471827 | -0.100615907 | 581         | 0.005915 | 0.024740629      |
| CD127+ CD3+ CD4+ CD45RA+ CD8-   | -0.269269756 | -0.460950442 | -0.077589071 | 581         | 0.005981 | 0.024740629      |
| CD27- CD3+ CD4- CD45RA+         | 0.340428284  | 0.095559295  | 0.585297272  | 658         | 0.006507 | 0.025746752      |
| CD27- CD3+ CD4- CD45RA+ CD8+    | 0.330147314  | 0.086943518  | 0.573351111  | 658         | 0.007877 | 0.028802095      |
| CD28+ CD3+ CD4+ CD8- CD85J-     | -0.32320752  | -0.562788624 | -0.083626416 | 580         | 0.00828  | 0.028802095      |
| CD19- CD27+ CD3+ IGD-           | -0.302704162 | -0.528463329 | -0.076944995 | 581         | 0.008679 | 0.028802095      |
| CD27+ CD28+ CD3+ CD8- CD85J-    | -0.314129949 | -0.548650412 | -0.079609486 | 580         | 0.008748 | 0.028802095      |
| CD127+ CD3+ CD4+ CD45RA-        | -0.243305806 | -0.425261375 | -0.061350238 | 581         | 0.008862 | 0.028802095      |
| CD3+ CD38+ CD4+ HLADR+          | -0.243993255 | -0.428686523 | -0.059299988 | 585         | 0.009709 | 0.030466776      |
| CD27+ CD3+ CD4+ CD45RA-         | -0.28642533  | -0.510191029 | -0.06265963  | 658         | 0.012196 | 0.0369952        |
| CD27+ CD3+ CD4+ CD45RA- CD8-    | -0.278068283 | -0.500099223 | -0.056037342 | 658         | 0.014185 | 0.041638856      |
| CD19+ CD20+ CD38+ IGD+          | 0.216005964  | 0.041558137  | 0.390453791  | 645         | 0.015312 | 0.043544362      |
| CD19+ CD20+ CD27- CD3-          | 0.287127373  | 0.052114608  | 0.522140138  | 581         | 0.01673  | 0.046132929      |
| CD19+ CD20+ CD27- CD3- IGD+     | 0.2843385    | 0.045023774  | 0.523653226  | 581         | 0.019961 | 0.053424276      |
| CD28+ CD3+ CD8- CD85J-          | -0.274067738 | -0.512925988 | -0.035209488 | 580         | 0.024597 | 0.063952381      |
| CD27+ CD3+ CD4- CD8+            | 0.180048464  | 0.017899525  | 0.342197403  | 736         | 0.029582 | 0.074775642      |
| CCR6+ CD4+ CD45RA+ CXCR3+ ICOS+ | -0.280037902 | -0.539162738 | -0.020913067 | 197         | 0.034317 | 0.082212353      |
| CD25+ CD3+ CD4+ CD8-            | -0.203362397 | -0.391665699 | -0.015059095 | 645         | 0.03433  | 0.082212353      |
| CD3+ CD4+ CD45RA- CD8-          | -0.157519624 | -0.305249544 | -0.009789703 | 871         | 0.036661 | 0.084534263      |
| CD27+ CD28+ CD3+ CD8+ CD85J+    | -0.253164879 | -0.491206146 | -0.015123612 | 580         | 0.037158 | 0.084534263      |
| CD16- CD56+ CD8+ HLADR+         | 0.178267504  | -0.00136662  | 0.357901628  | 581         | 0.051763 | 0.114887728      |
| CCR6+ CCR7+ CD4- CD45RA+        | 0.19047102   | -0.005549377 | 0.386491417  | 198         | 0.056777 | 0.120943514      |
| CD161- CD3+ CD4+ CD45RA- CD8-   | -0.228050444 | -0.463053146 | 0.006952257  | 581         | 0.057149 | 0.120943514      |
| CD4- CD8+ HLADR- PD1+           | 0.362439039  | -0.03128098  | 0.756159057  | 204         | 0.070983 | 0.146392065      |
| CD3+ CD4+ CD8- HLADR- PD1-      | -0.467395023 | -0.977675888 | 0.042885841  | 204         | 0.072392 | 0.146392065      |
| CD27+ CD3+ CD4+ CD45RA+ CD8+    | -0.193620969 | -0.411237177 | 0.023995239  | 658         | 0.081091 | 0.158059764      |
| CD19- CD20+ CD27- CD38+         | 0.149987239  | -0.018891517 | 0.318865995  | 645         | 0.081635 | 0.158059764      |
| CD27+ CD3+ CD4+ CD8+            | -0.172044818 | -0.374316278 | 0.030226642  | 736         | 0.095377 | 0.18081964       |
| CD28+ CD3+ CD4- CD8- CD85J-     | 0.13563695   | -0.036247191 | 0.307521092  | 580         | 0.12171  | 0.226033784      |
| CD28+ CD3+ CD4- CD85J-          | 0.134589662  | -0.040838138 | 0.310017462  | 580         | 0.132388 | 0.240946714      |
| CD38+ CD8+ HLADR+ PD1-          | -0.220940671 | -0.520971874 | 0.079090531  | 204         | 0.14803  | 0.264132287      |
| CD28+ CD3+ CD4+ CD45RA- CD85J-  | -0.167062545 | -0.39762871  | 0.063503621  | 580         | 0.155234 | 0.267568105      |
| CD19- CD20+ CD38+ IGD+          | 0.143696318  | -0.055836778 | 0.343229415  | 613         | 0.157777 | 0.267568105      |
| CD3+ CD38+ CD8+ PD1+            | 0.224825452  | -0.088610628 | 0.538261533  | 204         | 0.158777 | 0.267568105      |
| CD27- CD3+ CD4- CD45RA+ CD8-    | 0.159089744  | -0.075750221 | 0.39392971   | 658         | 0.183904 | 0.304277945      |
| CCR7+ CD28- CD3- CD4- CD45RA+   | 0.162622519  | -0.085021576 | 0.410266614  | 554         | 0.197618 | 0.321128723      |
| CD27- CD28+ CD3+ CD8- CD85J-    | 0.105408091  | -0.069688365 | 0.280504546  | 580         | 0.237533 | 0.377099778      |
| CD127+ CD161+ CD3+ CD4+ CD8+    | -0.090437753 | -0.241570948 | 0.060695442  | 581         | 0.240349 | 0.377099778      |
| CD27+ CD28+ CD3+ CD4+ CD8+      | -0.127583458 | -0.346915455 | 0.09174854   | 580         | 0.253714 | 0.39132173       |
| CD3+ CD4- CD45RA+ CD8-          | 0.103513429  | -0.076725921 | 0.283752779  | 871         | 0.25996  | 0.394272708      |
| CD28- CD3+ CD4+ CD8-            | -0.115538553 | -0.32519577  | 0.094118663  | 841         | 0.2797   | 0.417257576      |
| CD28+ CD3+ CD4- CD8+            | 0.089590954  | -0.08593163  | 0.265113539  | 841         | 0.316687 | 0.464815314      |
| CD27+ CD3+ CD4+ CD45RA- CD8+    | -0.103848952 | -0.315462567 | 0.107764664  | 658         | 0.335578 | 0.484723131      |
| CD28+ CD3+ CD4- CD8-            | 0.077275206  | -0.081934028 | 0.23648444   | 841         | 0.341013 | 0.484877337      |
| CD28+ CD3+ CD4- CD8+ CD85J-     | 0.091621008  | -0.099666679 | 0.282908696  | 580         | 0.347221 | 0.485529935      |
| CD27- CD28- CD8+ CD85J+         | 0.095895385  | -0.106373189 | 0.298163959  | 580         | 0.352143 | 0.485529935      |

|                                 |              |              |             |     |          |             |
|---------------------------------|--------------|--------------|-------------|-----|----------|-------------|
| CD3+ CD4+ CD8+ PD1+             | 0.169001887  | -0.216029035 | 0.55403281  | 204 | 0.387759 | 0.526657988 |
| CD19- CD27+ CD3+ CD38+ IGD+     | -0.095434457 | -0.321660622 | 0.130791709 | 514 | 0.4076   | 0.545465004 |
| CD27- CD3+ CD4+ CD45RA- CD8-    | 0.09002374   | -0.136011473 | 0.316058953 | 658 | 0.43446  | 0.572982911 |
| CD28+ CD3+ CD4+ CD8+            | -0.065577757 | -0.235946909 | 0.104791396 | 841 | 0.45014  | 0.585181901 |
| CD27+ CD28+ CD3+ CD4- CD85J-    | 0.073707726  | -0.120626771 | 0.268042224 | 580 | 0.456597 | 0.585215744 |
| CD3+ CD4- CD8+ PD1-             | 0.17810322   | -0.314501961 | 0.670708402 | 204 | 0.476682 | 0.602472812 |
| CD127+ CD161+ CD3+ CD8+         | -0.050283094 | -0.199862608 | 0.099296421 | 581 | 0.509344 | 0.63493616  |
| CD27+ CD3+ CD4- CD45RA- CD8+    | 0.07224048   | -0.154647121 | 0.299128081 | 658 | 0.532045 | 0.654271982 |
| CD3+ CD33+ CD8+ CXCR3+          | -0.104289372 | -0.443201278 | 0.234622535 | 204 | 0.544653 | 0.660845322 |
| CD27- CD28- CD45RA+ CD8- CD85J+ | -0.071513604 | -0.310555965 | 0.167528758 | 580 | 0.557026 | 0.666965678 |
| CD38+ CD8+ HLADR+ PD1+          | 0.10726925   | -0.263460553 | 0.477999053 | 204 | 0.568912 | 0.672350459 |
| CD127+ CD3+ CD4- CD8+           | -0.04130964  | -0.198094105 | 0.115474826 | 613 | 0.605026 | 0.705863544 |
| CD3+ CD38- CD4+ CD8- PD1-       | -0.062072579 | -0.405766053 | 0.281620895 | 204 | 0.722097 | 0.831782814 |
| CD27+ CD3+ CD4- CD8-            | 0.03113331   | -0.164018649 | 0.226285268 | 736 | 0.754214 | 0.857918747 |
| CD19+ CD20+ CD27+ CD38+ IGD+    | -0.021772189 | -0.208724725 | 0.165180346 | 645 | 0.81918  | 0.920313832 |
| CD27- CD3+ CD4+ CD8+            | -0.013626954 | -0.148084053 | 0.120830145 | 736 | 0.84234  | 0.934792123 |
| CD19- CD27- CD38+ IGD+          | 0.008228212  | -0.10846773  | 0.124924154 | 578 | 0.889899 | 0.966377449 |
| CD27- CD3+ CD4+ CD8-            | 0.011426338  | -0.197977751 | 0.220830427 | 736 | 0.914718 | 0.966377449 |
| CD27- CD28- CD3+ CD4+           | -0.013153773 | -0.256217993 | 0.229910447 | 580 | 0.915387 | 0.966377449 |
| CD127+ CD161+ CD3+ CD4- CD8+    | 0.009289529  | -0.176255408 | 0.194834467 | 581 | 0.921699 | 0.966377449 |
| CD27+ CD3+ CD45RA- CD8+         | -0.00919664  | -0.228955967 | 0.210562686 | 658 | 0.934532 | 0.966377449 |
| CD27- CD28- CD3+ CD4+ CD8-      | 0.008379157  | -0.241782758 | 0.258541072 | 580 | 0.947569 | 0.966377449 |
| CD19- CD3+ CD4+ CD8+            | -0.006274057 | -0.196015607 | 0.183467493 | 651 | 0.948248 | 0.966377449 |
| CD3+ CD38+ CD8+ HLADR+          | -0.0046591   | -0.169537591 | 0.160219391 | 585 | 0.955758 | 0.966377449 |
| CD127+ CD3+ CD4- CD8-           | -0.002390676 | -0.165738561 | 0.160957209 | 613 | 0.977079 | 0.977078927 |

Supplementary Table 6: A table summarizing the effect size of race to the proportion of cell subsets identified by the unsupervised analysis pipeline when comparing cytometry data of blood from Asian and White subjects. The effect sizes are estimated from the meta-analysis of 10 human immunology studies.
